# Supplementary material for: Conserved regulation of Nodal-mediated left-right patterning in zebrafish and mouse
Source: Oxford University Press journal article supplement (doi:10.1242/dev.171090), 2018-11-16
Supplement: dev171090supp.pdf [file dev171090supp.pdf]

|                                         |                                                                                                                                                                                                                                                                                                                                                                                                                                                  |
|-----------------------------------------|--------------------------------------------------------------------------------------------------------------------------------------------------------------------------------------------------------------------------------------------------------------------------------------------------------------------------------------------------------------------------------------------------------------------------------------------------|
| WT <i>dand5</i>                         | MTFQVGFFVLLSVTTIGAFPRNAFQR EFHRHVAKDFESSGNGPDEPVRGSRIVKLNPHF<br>LRRAAVSHVPRNSPSRGAFPALAL GRPGPAILTHSKPAPQVSSSADRRKQGLEMWKKV<br>VHKSERKKEAVALRINPKDMNKQSCA AVPFTQRITTEGCETVTVHNNLCYGQCSSMFVPS<br>SGGSHGQQKAQCTRCGPSRARSVLLH LRCGSEVRERRVLIVEECKCETSSEEAKVQNTDM<br>FNL*                                                                                                                                                                            |
| sgRNA target                            | GGACCAGACGAACCTGTTTCG GGG                                                                                                                                                                                                                                                                                                                                                                                                                        |
| <i>dand5</i> <sup>a204</sup> (4 bp del) | MTFQVGFFVLLSVTTIGAFPRNAFQR EFHRHVAKDFESSGNGPDEPGDLSELSN*                                                                                                                                                                                                                                                                                                                                                                                         |
| WT <i>spaw</i>                          | MQPVIACASFALFVLRVDCVWIDKN GAFIKDHRTAFFGAYSSQFYPRYPLYMMQLYRDF<br>SGNKMLTTPASVDN PALHQSDVFLSL IAQDCHQTEERWTVSFDMSSLSASDNIQLSELRI<br>RLPAFSASRRVTVDIFHQHKQHCASD SVFCRNKKLFLGSVKSVDVSQSSSSWRVFNITEL<br>LQQWLIQGMDTPDRVTAPDYDQSGS GSGDDFIESLTSSWPRKIQHPTAERVMIVVFYKE<br>TVTHSASSLMNTVAQSKYVTLNRPAD GTQGRRHKRNRVERMRMTDDRNVTKPTPSEEQQ<br>ASLCRRVDMWVDFDQIGWDEWIVHPK RYNAYRCEGECPSPLDETYNPTNHAYMQSLLKLY<br>QPERVSCPCVPLRLSSLSMLYYEGD GVVMRHHEMIVEECGCH* |
| sgRNA targets                           | GTACCTTGGATAAAACTGGC TGG and AGTTATACAGAGACTTCAGC GGG                                                                                                                                                                                                                                                                                                                                                                                            |
| <i>spaw</i> <sup>a205</sup> (49 bp del) | MQPVIACASFALFVLRVDCVWIDKN GAFIKDHRTAFFGAYSSQAGIRC*                                                                                                                                                                                                                                                                                                                                                                                               |

**Table S1.**

A) A 4 bp deletion in the first exon of *dand5* (*dand5*<sup>a204</sup>) caused a frameshift in the protein, truncating it from 243 amino acids to 54 amino acids. B) A 49 bp deletion in the first exon of *spaw* (*spaw*<sup>a205</sup>) truncated the protein from 404 amino acids to 49 amino acids.

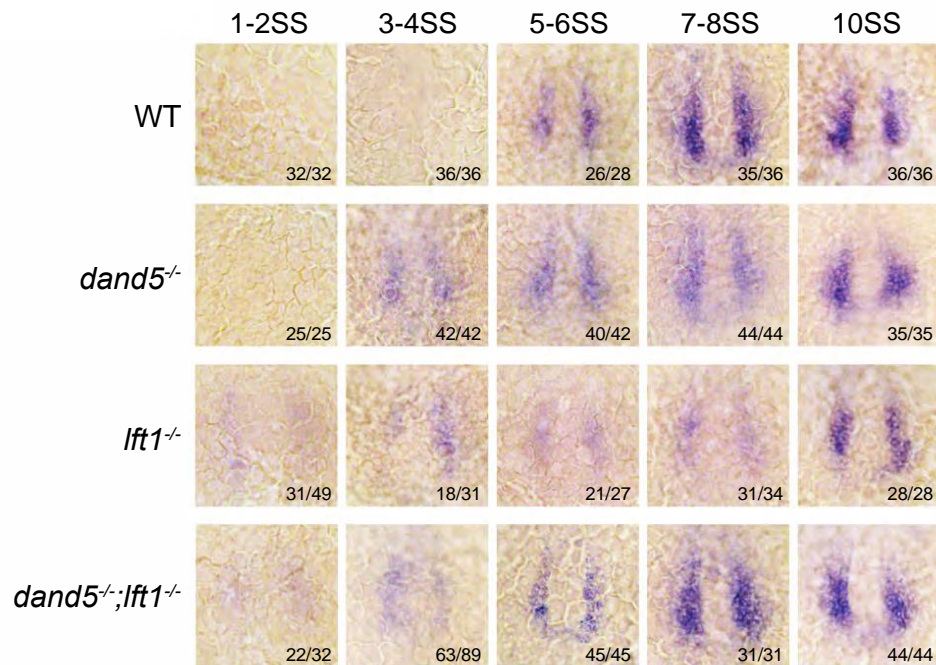

**Fig. S1.** Expression of *spaw* around Kupffer's vesicle in WT, *dand5*, *lefty1* and *dand5*;*lefty1* mutants from 1-2 somite stage (SS) to 10SS.

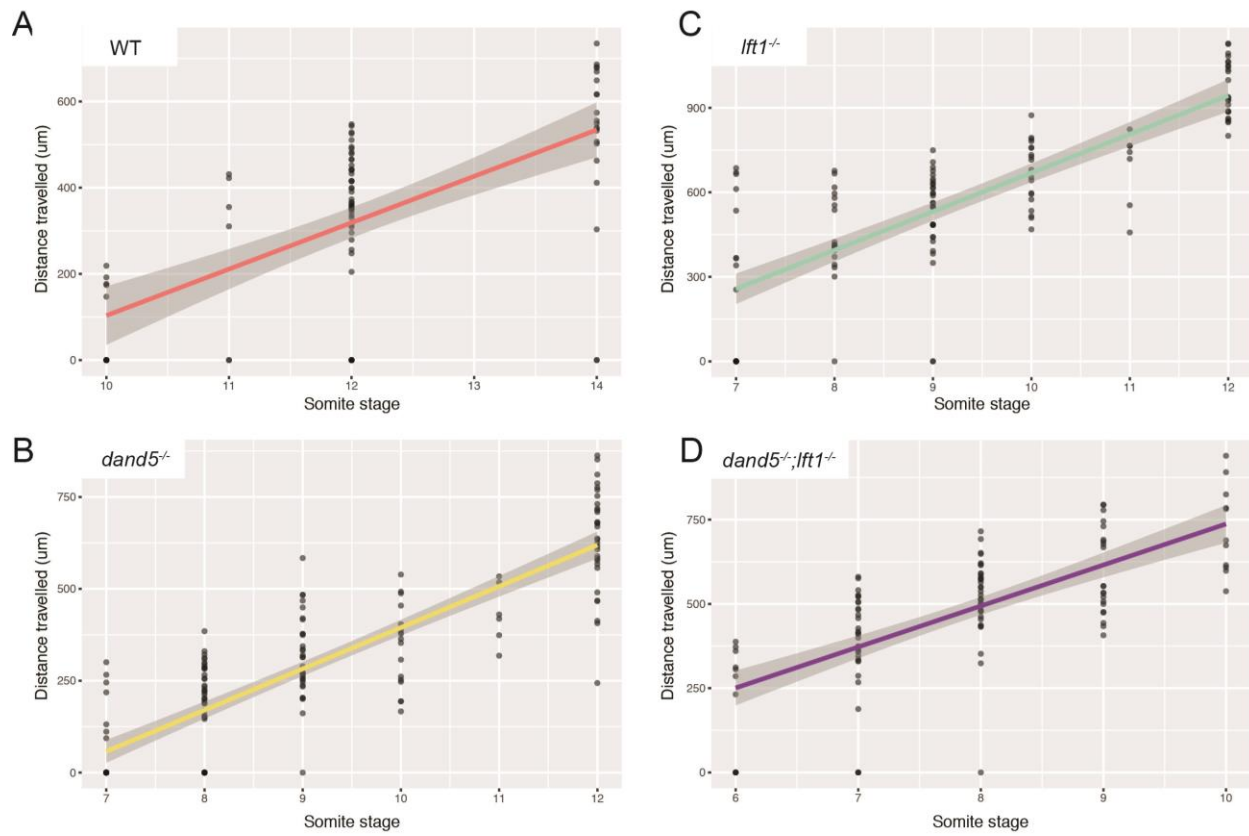

**Fig. S2. Scatterplots of *spaw* progression in the LPM in WT, *dand5*, *lefty1* and *dand5;lefty1* mutants.** Linear regression lines were fitted to the data from time points where expression had already initiated in the LPM. The slope of the graph represents the rate of *spaw* propagation. Grey shadow represents the 95% confidence interval.
